# Supplementary material for: A stable and flexible dianion: 2dicyanomethylene1,1,3,4,5,5hexacyanopentenediide (DHCP2−), and its complex formation
Source: Royal Society of Chemistry journal article supplement (doi:10.1039/b006426m), 2001-01-01
Supplement: b006426m.doc [file b006426m.doc]

Table S1. Calculated atomic coordinates of hydrogen atoms

on disordered ethylene groups of C and D molecules in ***ET1***.

--------------------------------------------

x/a y/b z/c

--------------------------------------------

H49A 0.34961 0.83533 0.13803

H49B 0.45856 0.84939 0.29495

H49C 0.29168 0.78744 0.03176

H49D 0.35944 0.84451 0.16127

H49E 0.36192 0.84969 0.19632

H49F 0.50159 0.83641 0.28290

H49G 0.31884 0.77888 0.01465

H49H 0.33140 0.84126 0.13691

H50A 0.59159 0.83284 0.20631

H50B 0.48700 0.85290 0.06151

H50C 0.49459 0.84516 0.12423

H50D 0.39419 0.82425 -0.03512

H50E 0.46491 0.85156 0.04417

H50F 0.36028 0.79589 -0.01702

H50G 0.57135 0.82099 0.23209

H50H 0.51601 0.85938 0.08634

H57A 1.18183 0.22894 1.05383

H57B 1.11879 0.15751 1.03196

H57C 1.12316 0.17406 1.01043

H57D 0.99900 0.13402 0.91822

H57E 1.18359 0.23091 1.02929

H57F 1.12950 0.16005 1.04216

H57G 1.09050 0.15537 1.01833

H57H 0.98221 0.14220 0.86115

H58A 1.06429 0.15075 0.79038

H58B 1.20618 0.16241 0.87554

H58C 0.99451 0.15968 0.69513

H58D 1.13016 0.14072 0.78380

H58E 1.11279 0.13547 0.75959

H58F 0.98190 0.16715 0.72625

H58G 1.12210 0.14202 0.78873

H58H 1.20992 0.18668 0.93232

--------------------------------------------

Table S2. Intermolecular Atomic Contacts (Å) in ***ET1***.*

---------------------------------------------------------------------------------------

S23 - S58 3.474(6) S24 - S37 3.503(6) S26 - S31 3.554(6)

S26 - S35 3.442(6) S27 - S58 3.373(6) S28 - S37 3.519(7)

S36 - S45 3.462(6) S38 - S43 3.449(6) S38 - S47 3.305(6)

S46 - S55 3.509(7) S48 - S57 3.410(7) N1 - H47A 2.74(3)

N1 - H57H 2.52(4) N1 - H58C 2.44(4) N1 - H58F 2.35(3)

N2 - H30B 2.61(2) N3 - H50B 2.65(4) N3 - H50H 2.67(4)

N3 - H59B 2.63(3) N3 - S48 3.053(15) N4 - H30A 2.61(2)

N4 - H49E 2.63(3) N5 - H27A 2.67(2) N5 - H37B 2.644(2)

N6 - S35 3.252(14) N6 - H28A 2.533(2) N6 - H58H 2.73(3)

N7 - H37A 2.52(3) N8 - H50A 2.21(3) N8 - H50G 2.39(3)

---------------------------------------------------------------------------------------

* In the calculation with calculated hydrogen atoms (Table S1), the standard deviation of them were adopted as the same values as that of their parent carbon atoms.

Table S3. Intermolecular Atomic Contacts (Å) in ***ET2***.

---------------------------------------------------------------------------------------

S21 - S57 3.500(4) S22 - S58 3.552(4) S25 - S57 3.436(4)

S26 - S58 3.491(4) S27 - S55 3.447(5) S27 - S51 3.567(5)

S28 - S52 3.455(4) S28 - S56 3.429(4) S31 - S47 3.588(4)

S32 - S48 3.499(4) S35 - S47 3.447(4) S36 - S48 3.350(4)

S37 - S41 3.583(4) S37 - S45 3.426(4) S38 - S46 3.404(4)

S38 - S42 3.513(4) N1 - S36 3.239(11) N1 - H50A 2.70(1)

N2 - H27A 2.74(3) N2 - H27C 2.54(4) N3 - H29A 2.62(2)

N4 - H30A 2.53(2) N4 - H60B 2.66(1) N5 - H60A 2.59(1)

N6 - H40A 2.67(1) N7 - H37B 2.73(2) N8 - S35 3.162(14)

N8 - H37B 2.69(1) N8 - H49A 2.59(2)

---------------------------------------------------------------------------------------
